# Supplementary material for: Kaempferol-3-O-rutinoside, a flavone derived fromTetrastigma hemsleyanum, suppresses lung adenocarcinomaviathe calcium signaling pathway
Source: Royal Society of Chemistry journal article supplement (doi:10.1039/d1fo00581b), 2021-01-01
Supplement: d1fo00581b1.pdf [file d1fo00581b1.pdf]

### Supplementary materials

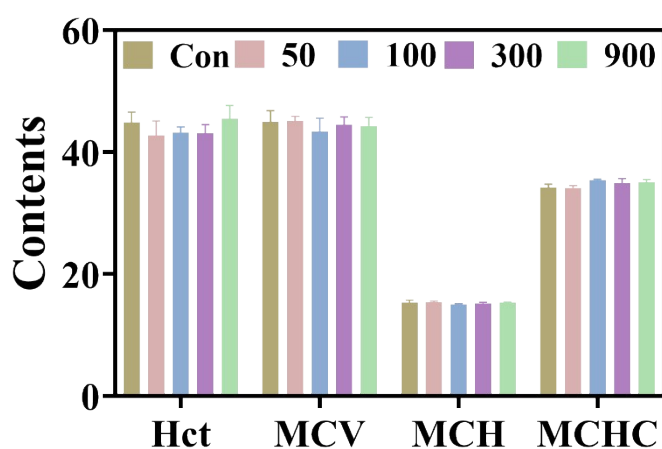

**Figure S1**, Blood routine examination of mice. Hct, MCV, MCH, MCHC are representative of hematokrit, mean erythrocyte volume, neutrophilic granulocyte percentage and mean corpuscular hemoglobin concentration, respectively.

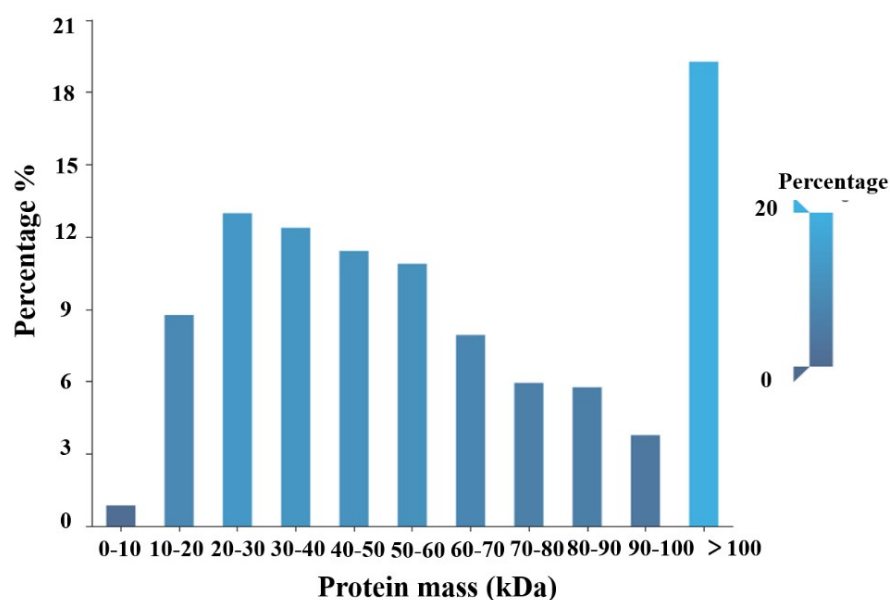

**Figure S2**. All identified protein sequences. X axis: Protein molecular weight range

(kDa), Y axis: protein ratio.

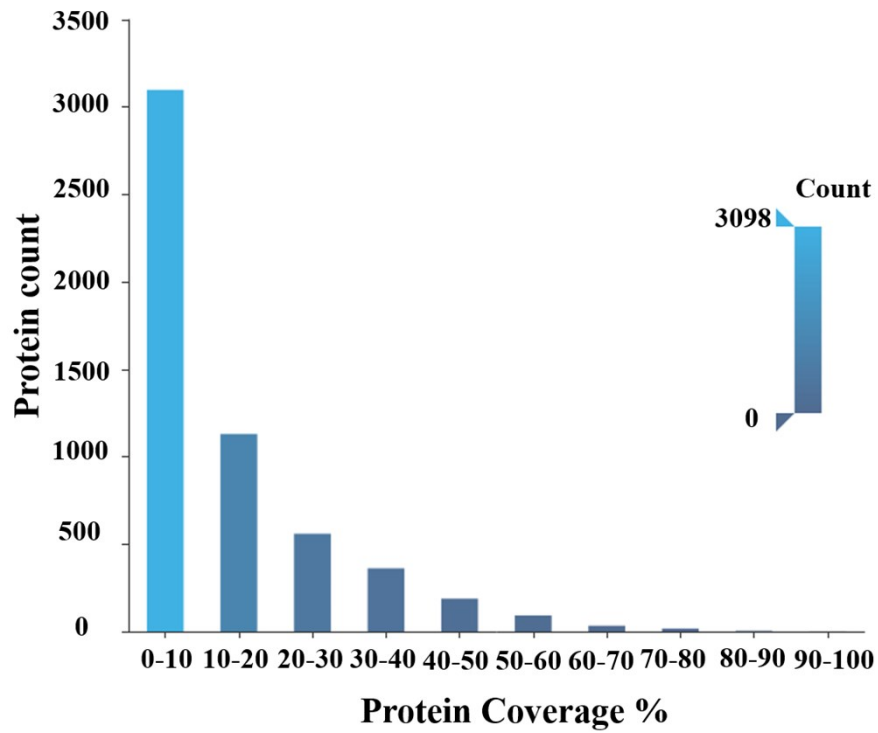

**Figure S3.** Protein coverage distribution. X axis: protein coverages, Y axis: protein number.

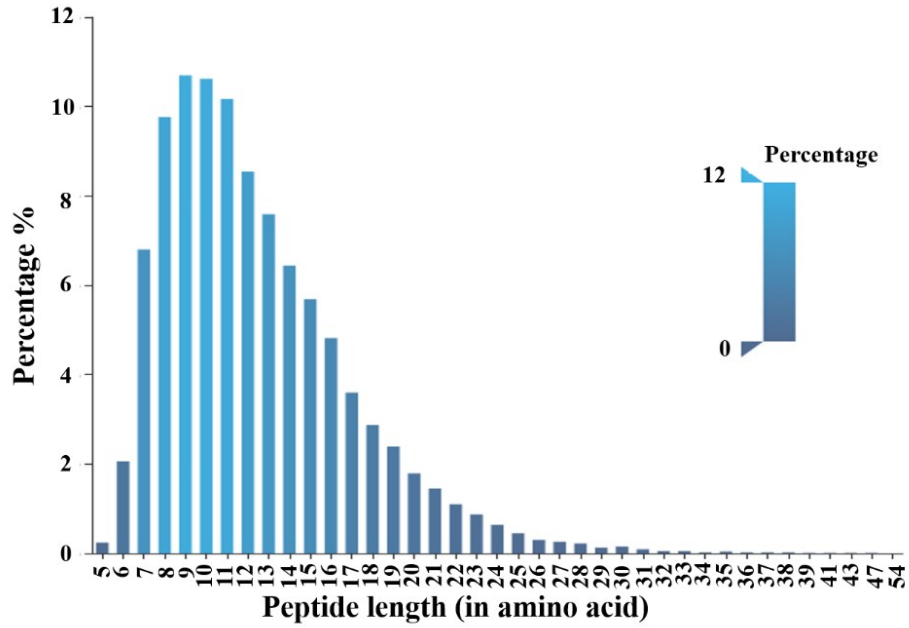

**Figure S4.** Peptide length distribution. X axis: peptide length (in amino acids), Y axis: percentage of corresponding peptide.

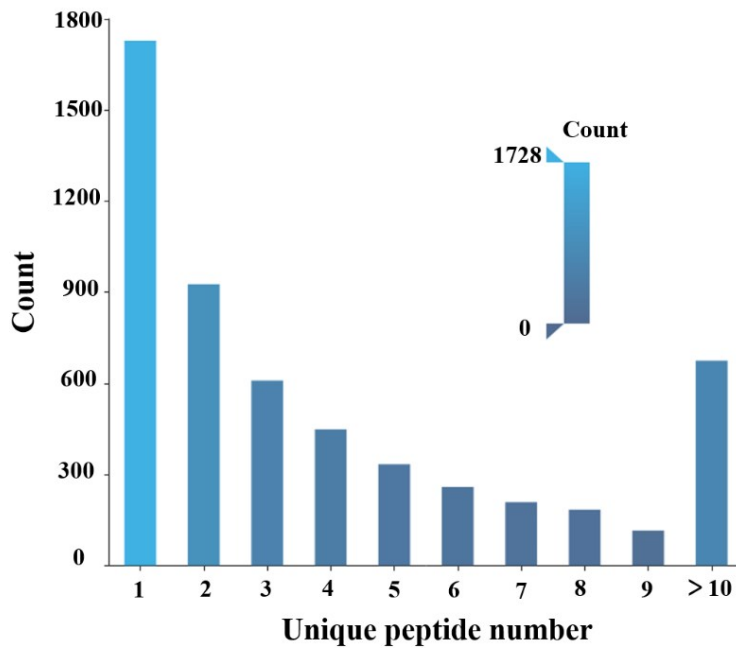

**Figure S5.** Unique peptide number distribution. X axis: unique peptide number, Y axis: protein number.

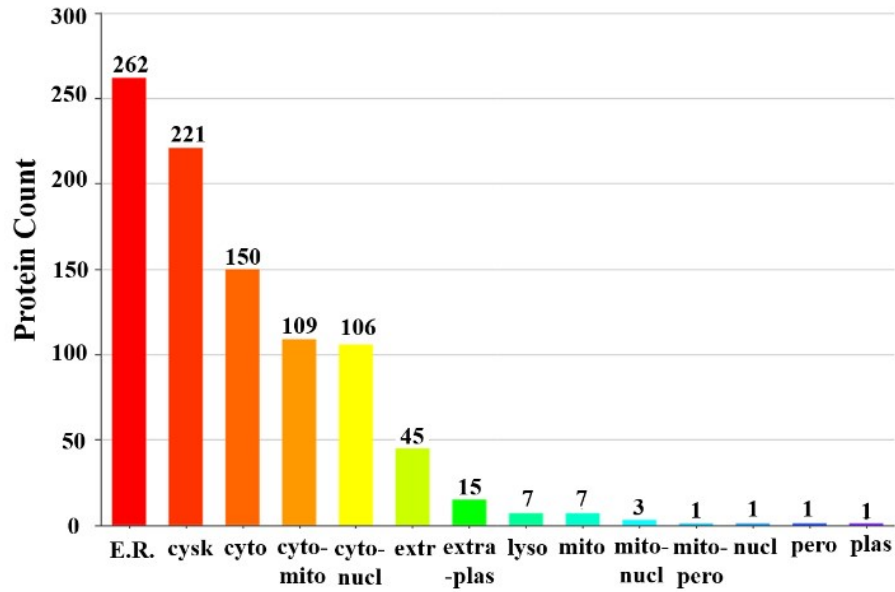

**Figure S6.** Subcellular localization of DEPs. Control: tumors from model group mice; Treated: tumors from THTF-treated group mice. Abbreviations: E.R.: endoplasmic reticulum; cysk: cytoskeleton; cyto: cytoplasm; mito: mitochondria; nucl: nucleus; extr: extracellular cytoplasm; lyso: lysosome; pero: peroxisome; plas: plasma membrane.

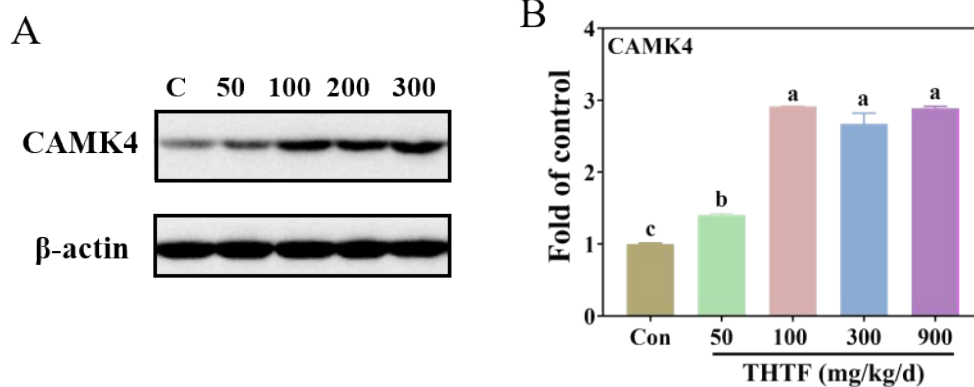

**Figure S7.** Verification of proteome results. (A) The intensities of CAMK4; (B) The quantitative results of CAMK4 corrected by  $\beta$ -actin.

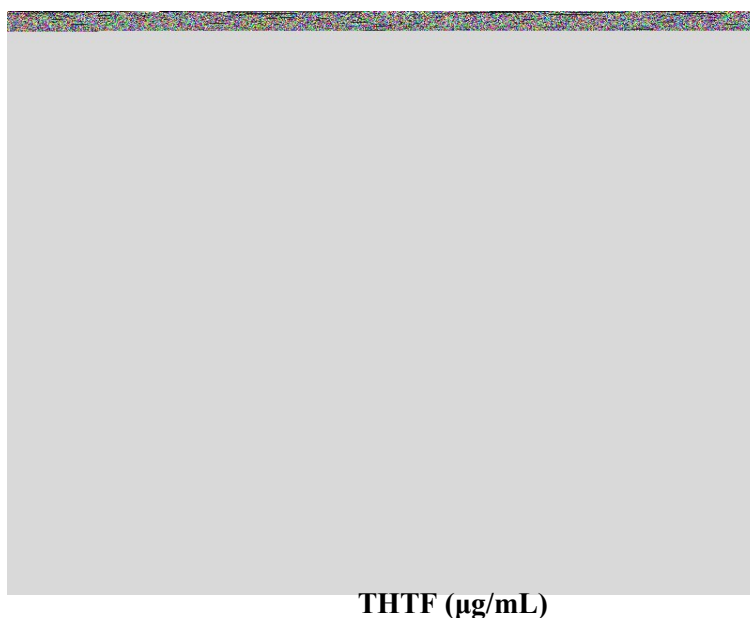

**Figure S8.** The cell viabilities of A549 cells incubated with different THTF concentrations (100-1000  $\mu\text{g/mL}$ )

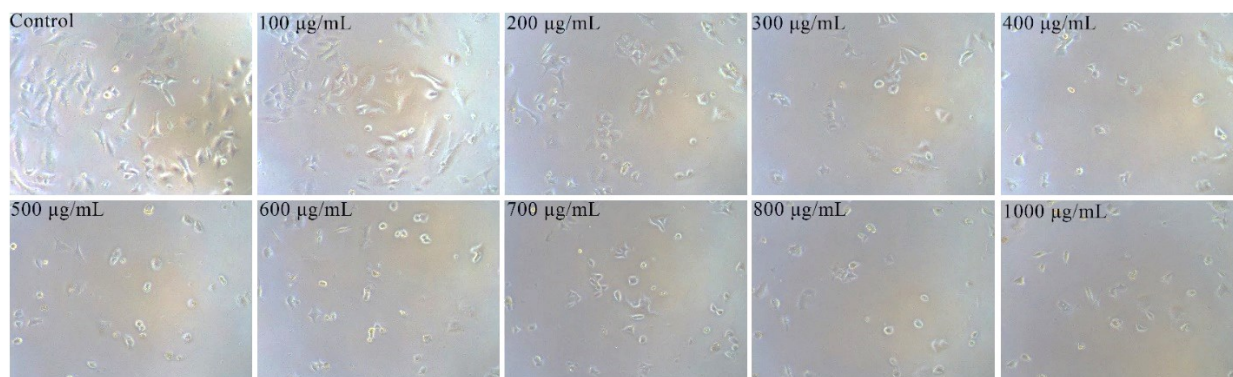

**Figure S9.** The morphological alternation of A549 cells after THTF treatments.

**Table S1. Some of significantly up-regulated DEPs.**

| Protein_ID            | Description                                             | Mean Ratio | P-value_    |
|-----------------------|---------------------------------------------------------|------------|-------------|
| sp Q8K120 NFAC4_MOUSE | Nuclear factor of activated T-cells, cytoplasmic 4      | 9.61       | 8.11E-13    |
| sp P08414 KCC4_MOUSE  | Calcium/calmodulin-dependent protein kinase type IV     | 8.45       | 2.62E-09    |
| sp E9Q4Z2 ACACB_MOUSE | Acetyl-CoA carboxylase 2                                | 7.86       | 2.58E-08    |
| sp Q9Z331 K2C6B_MOUSE | Keratin, type II cytoskeletal 6B                        | 5.03       | 3.45E-09    |
| sp P50446 K2C6A_MOUSE | Keratin, type II cytoskeletal 6A                        | 4.99       | 1.51E-09    |
| sp Q8CIS0 CAR11_MOUSE | Caspase recruitment domain-containing protein 11        | 4.72       | 3.08E-09    |
| sp Q9JM83 CALM4_MOUSE | Calmodulin-4                                            | 3.65       | 1.05E-08    |
| sp Q9D6P8 CALL3_MOUSE | Calmodulin-like protein 3                               | 3.49       | 1.30E-09    |
| sp Q8R080 GTSE1_MOUSE | G2 and S phase-expressed protein 1                      | 3.49       | 4.77E-10    |
| sp P20334 TNR9_MOUSE  | Tumor necrosis factor receptor superfamily member 9     | 3.38       | 1.17E-08    |
| sp P04104 K2C1_MOUSE  | Keratin, type II cytoskeletal 1                         | 3.25       | 3.23E-11    |
| sp P51944 CCNF_MOUSE  | Cyclin-F                                                | 3.16       | 7.19E-07    |
| sp Q61161 M4K2_MOUSE  | Mitogen-activated protein kinase kinase kinase kinase 2 | 3.13       | 0.000001223 |
| sp Q922U2 K2C5_MOUSE  | Keratin, type II cytoskeletal 5                         | 3.12       | 4.86E-11    |
| sp P02535 K1C10_MOUSE | Keratin, type I cytoskeletal 10                         | 3.01       | 4.74E-13    |
| sp Q9CQ54 NDUC2_MOUSE | NADH dehydrogenase [ubiquinone] 1 subunit C2            | 2.89       | 7.06E-07    |
| sp Q61781 K1C14_MOUSE | Keratin, type I cytoskeletal 14                         | 2.84       | 3.59E-10    |
| sp Q60722 ITF2_MOUSE  | Transcription factor 4                                  | 2.7        | 7.03E-10    |
| sp Q99J79 DDB2_MOUSE  | DNA damage-binding protein 2                            | 2.62       | 0.000001706 |
| sp Q6IFZ6 K2C1B_MOUSE | Keratin, type II cytoskeletal 1b                        | 2.31       | 3.65E-10    |
| sp Q8CE33 KLH11_MOUSE | Kelch-like protein 11                                   | 2.26       | 0.04461     |
| sp Q9CWE0 MFR1L_MOUSE | Mitochondrial fission regulator 1-like                  | 2.1        | 9.98E-09    |
| sp Q9CQZ7 RPC10_MOUSE | DNA-directed RNA polymerase III subunit RPC10           | 2.05       | 4.17E-10    |

|                       |                                                   |      |             |
|-----------------------|---------------------------------------------------|------|-------------|
| sp Q8K201 KCT2_MOUSE  | Keratinocyte-associated transmembrane protein 2   | 1.95 | 0.000008778 |
| sp P01639 KV5A7_MOUSE | Ig kappa chain V-V region MOPC 41                 | 1.92 | 6.01E-07    |
| sp Q9WTR2 M3K6_MOUSE  | Mitogen-activated protein kinase kinase kinase 6  | 1.91 | 0.0002752   |
| sp P35283 RAB12_MOUSE | Ras-related protein Rab-12                        | 1.91 | 1.34E-07    |
| sp P01796 HVM27_MOUSE | Ig heavy chain V-III region A4                    | 1.84 | 0.00006076  |
| sp Q8VHC3 SELM_MOUSE  | Selenoprotein M                                   | 1.84 | 0.01116     |
| sp A8E0Y8 IGSF2_MOUSE | Immunoglobulin superfamily member 2               | 1.83 | 0.000005656 |
| sp P15306 TRBM_MOUSE  | Thrombomodulin                                    | 1.83 | 0.000009708 |
| sp Q8K0E1 KCD15_MOUSE | BTB/POZ domain-containing protein KCTD15          | 1.83 | 1.99E-07    |
| sp Q9WV95 PHLA3_MOUSE | Pleckstrin homology-like domain family A member 3 | 1.83 | 2.32E-07    |
| sp P51906 EAA3_MOUSE  | Excitatory amino acid transporter 3               | 1.83 | 2.67E-07    |
| sp Q99JY3 GIMA4_MOUSE | GTPase IMAP family member 4                       | 1.82 | 0.000005042 |
| sp A1L314 MPEG1_MOUSE | Macrophage-expressed gene 1 protein               | 1.81 | 2.52E-07    |
| sp Q8BWM0 PGES2_MOUSE | Prostaglandin E synthase 2                        | 1.81 | 0.01996     |
| sp Q6S7F2 E2F7_MOUSE  | Transcription factor E2F7                         | 1.81 | 0.0001312   |
| sp Q61337 BAD_MOUSE   | Bcl2-associated agonist of cell death             | 1.23 | 0.001464    |

**Table S2. Some of significantly down-regulated DEPs.**

| Protein ID            | Protein description                                 | Mean Ratio | P-value  |
|-----------------------|-----------------------------------------------------|------------|----------|
| sp Q689Z5 SBNO1_MOUSE | Protein strawberry notch homolog 1                  | 0.49       | 0.000469 |
| sp P27090 TGFB2_MOUSE | Transforming growth factor beta-2 proprotein        | 0.51       | 0.007083 |
| sp A7DTG3 SRTD4_MOUSE | SERTA domain-containing protein 4                   | 0.51       | 0.00108  |
| sp Q9CX84 RGS19_MOUSE | Regulator of G-protein signaling 19                 | 0.55       | 5.33E-05 |
| sp P43135 COT2_MOUSE  | COUP transcription factor 2                         | 0.56       | 0.002223 |
| sp Q8R1V4 TMED4_MOUSE | Transmembrane emp24 domain-containing protein 4     | 0.59       | 9.22E-05 |
| sp Q80VJ3 DNPH1_MOUSE | 2'-deoxynucleoside 5'-phosphate N-hydrolase 1       | 0.61       | 0.003155 |
| sp Q8C052 MAP1S_MOUSE | Microtubule-associated protein 1S                   | 0.62       | 0.01304  |
| sp P59110 SENP1_MOUSE | Sentrin-specific protease 1                         | 0.62       | 0.01254  |
| sp A2ASI5 SCN3A_MOUSE | Sodium channel protein type 3 subunit alpha         | 0.62       | 6.17E-07 |
| sp F6XZJ7 SAM15_MOUSE | Sterile alpha motif domain-containing protein 15    | 0.63       | 0.03219  |
| sp O08543 EFNA5_MOUSE | Ephrin-A5                                           | 0.63       | 0.02599  |
| sp Q91WC1 POTE1_MOUSE | Protection of telomeres protein 1 SV=1              | 0.63       | 1.03E-05 |
| sp Q8K4E0 ALMS1_MOUSE | Alstrom syndrome protein 1 homolog                  | 0.64       | 2.28E-07 |
| sp Q64337 SQSTM_MOUSE | Sequestosome-1 (Ubiquitin-binding protein p62)      | 0.65       | 0.003064 |
| sp Q3TLS3 GDPP1_MOUSE | GDP-D-glucose phosphorylase 1                       | 0.65       | 0.01339  |
| sp O35114 SCRB2_MOUSE | Lysosome membrane protein 2 V=3                     | 0.65       | 0.00011  |
| sp Q9CY21 BUD23_MOUSE | Probable 18S rRNA (guanine-N (7))-methyltransferase | 0.66       | 1.2E-05  |
| sp Q03145 EPHA2_MOUSE | Ephrin type-A receptor 2                            | 0.66       | 0.000936 |
| sp Q571H0 NPA1P_MOUSE | Nucleolar pre-ribosomal-associated protein 1        | 0.67       | 2.52E-05 |
| sp Q9D823 RL37_MOUSE  | 60S ribosomal protein L37                           | 0.67       | 0.000191 |
| sp Q8BG17 NOL12_MOUSE | Nucleolar protein 12                                | 0.68       | 1.11E-05 |
| sp Q9ESW8 PGPI_MOUSE  | Pyroglutamyl-peptidase 1                            | 0.68       | 0.002262 |
| sp Q9CWU9 NUP37_MOUSE | Nucleoporin Nup37                                   |            | 0.000193 |



---

|                       |                                                       |          |
|-----------------------|-------------------------------------------------------|----------|
| sp Q8CJC7 KLRE1_MOUSE | Killer cell lectin-like receptor subfamily E member 1 | 0.00102  |
| sp O35969 GAMT_MOUSE  | Guanidinoacetate N-methyltransferase 1 SV=1           | 0.001377 |
| sp Q8C1D8 IWS1_MOUSE  | Protein IWS1 homolog                                  | 4.35E-05 |
| sp Q99JW5 EPCAM_MOUSE | Epithelial cell adhesion molecule                     | 1.65E-06 |
| sp Q91WE3 RPP25_MOUSE | Ribonuclease P protein subunit p25                    | 0.01021  |

---

**Table S3. The full name of abbreviations in Figure 4.**

| <b>Abbreviation</b> | <b>Full name</b>                                                                |
|---------------------|---------------------------------------------------------------------------------|
| 1                   | calcium pump 1                                                                  |
| 2                   | CaM kinase-GR                                                                   |
| 3                   | troponin C                                                                      |
| 4                   | Immunoglobulin heavy chain gamma polypeptide STNC (Troponin C, skeletal muscle) |
| 5                   | TCS                                                                             |
| Fgg                 | Fibrinogen gamma chain                                                          |
| Fga                 | Fibrinogen alpha chain                                                          |
| Fgb                 | Fibrinogen beta chain                                                           |
| Camk4               | Calcium/calmodulin-dependent protein kinase type IV                             |
| Xrcc6               | X-ray repair cross-complementing protein 6                                      |
| Actn2               | alpha-actinin-2                                                                 |
| Myh4                | myosin-4                                                                        |
| Atp2a1              | Sarcoplasmic/endoplasmic reticulum calcium ATPase 1                             |
| Tnnc2               | Troponin C, skeletal muscle                                                     |
| Mybpc2              | Myosin-binding protein C, fast-type                                             |
| Myh1                | Myosin-1                                                                        |
| Pygm                | Glycogen phosphorylase, muscle form                                             |
| Des                 | Desmin                                                                          |
| Ttn                 | Titin                                                                           |
| Actn3               | alpha-actinin-3                                                                 |
| Myh11               | Myosin light chain 1/3, skeletal muscle isoform                                 |
| Myh11               | Myosin light chain, phosphorylatable, fast skeletal muscle                      |
| Casq1               | Calsequestrin-1                                                                 |
| Srl                 | Sarcalumenin                                                                    |

---

|         |                                  |
|---------|----------------------------------|
| Apobec2 | C->U-editing enzyme APOBEC-2     |
| My14    | Myosin light chain 4             |
| Tnnt3   | Troponin T, fast skeletal muscle |
| Krt6b   | Keratin, type II cytoskeletal 6B |
| Krt77   | Keratin, type II cytoskeletal 1b |
| Krt14   | Keratin, type I cytoskeletal 14  |
| Krt5    | Keratin, type II cytoskeletal 5  |
| Krt1    | Keratin, type II cytoskeletal 1  |
| Dsg1a   | Desmoglein-1-alpha               |
| Pkg1    | Plakophilin-1                    |

---
